# Supplementary material for: Epidemiology and Fracture Patterns of Traumatic Phalangeal Fractures
Source: PubMed Central journal article supplement — Plast Reconstr Surg Glob Open. 2022 Aug 4;10(8):e4455. doi: 10.1097/GOX.0000000000004455 (PMC9351885; doi:10.1097/gox.0000000000004455), 2022-08-04
Supplement: gox-10-e4455-s001.pdf [file gox-10-e4455-s001.pdf]

## SDC 1 — CPT Codes for surgical and conservative care of phalangeal fractures

### Closed treatment without manipulation

- 26720: Closed treatment of phalangeal shaft fracture, proximal or middle phalanx, finger or thumb; without manipulation, each
- 26740: Closed treatment of articular fracture, involving metacarpophalangeal or proximal interphalangeal joint; without manipulation, each
- 26750: Closed treatment of distal phalangeal fracture, finger or thumb; without manipulation, each

### Closed treatment with manipulation

- 26725: Closed treatment of phalangeal shaft fracture, proximal or middle phalanx, finger or thumb; with manipulation, with or without skin or skeletal traction, each
- 26742: Closed treatment of articular fracture, involving metacarpophalangeal or proximal interphalangeal joint; with manipulation, each
- 26755: Closed treatment of distal phalangeal fracture, finger or thumb; with manipulation, each

### Percutaneous fixation

- 26727: Percutaneous skeletal fixation of unstable phalangeal shaft fracture, proximal or middle phalanx, finger or thumb, with manipulation, each
- 26756: Percutaneous skeletal fixation of distal phalangeal fracture, finger or thumb, each

### Open treatment

- 26765: Open treatment of distal phalangeal fracture, finger or thumb, with or without internal or external fixation, each
- 26735: Open treatment of phalangeal shaft fracture, proximal or middle phalanx, finger or thumb, with or without internal or external fixation, each
- 26746: Open treatment of articular fracture, involving metacarpophalangeal or proximal interphalangeal joint, with or without internal or external fixation

**CPT: Current Procedural Terminology**
